# Supplementary material for: in silico Surveillance: evaluating outbreak detection with simulation models
Source: Springer Nature journal article supplement (doi:10.1186/1472-6947-13-12), 2013-01-23

Proportion Detected vs. Detection Delay

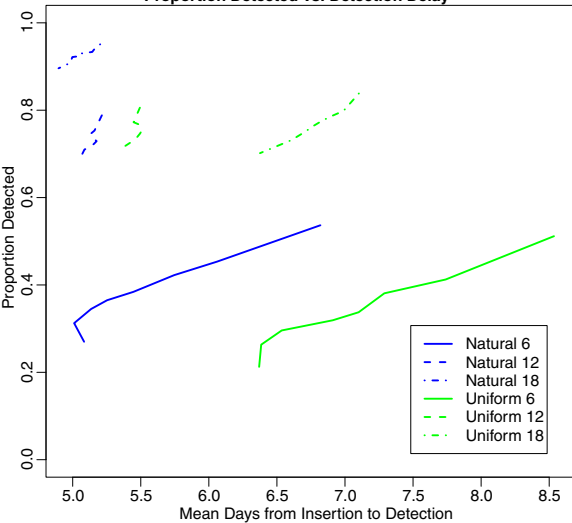

Supplement: 12911_2012_684_MOESM9_ESM.pdf [file 12911_2012_684_MOESM9_ESM.pdf]
